# Supplementary material for: Cardioprotective potential of N-acetyl cysteine against hyperglycaemia-induced oxidative damage: a protocol for a systematic review
Source: Syst Rev. 2017 May 12;6:96. doi: 10.1186/s13643-017-0493-8 (PMC5427588; doi:10.1186/s13643-017-0493-8)
Supplement: Supplementary file 2 — Search strategy. [file 13643_2017_493_MOESM2_ESM.docx]

**Additional file 2: Search strategy run 03 March 2017**

| **Concept 1:**  **N acetyl cysteine** | **Synonyms to be searched (MeSH OR textwords)** | |
| --- | --- | --- |
| **PubMed** (hits= 17805)  ("acetylcysteine"[MeSH Terms] OR "acetylcysteine"[All Fields] OR "n acetyl cysteine"[All Fields]) | Acemuc | Acebraus |
| Acetabs | Acétylcystéine GNR |
| Acetylcystein AL | Acetylcysteine, monoammonium salt |
| Acetylcystein Atid | Acetylin |
| Acetylcystein Heumann | Acetyst |
| Acetylcystein Trom | Airbron |
| Acetylcystein, mentopin | Alveolex |
| Acetylcysteine Hydrochloride | Azubronchin |
| Acetylcysteine Sodium | Bisolvon NAC |
| Acetylcysteine Zinc | Bromuc |
| Acetylcysteine, (D)-Isomer | Broncho Fips |
| Acetylcysteine, (DL)-Isomer | BronchoFips |
| Acetylcysteine, Monosodium Salt | Broncho-Fips |
| Acid, Mercapturic | Broncholysin |
| Fabrol | Broncoclar |
| Fluimucil | Codotussyl |
| Fluprowit | Cystamucil |
| Genac | Dampo Mucopect |
| Hydrochloride, Acetylcysteine | Durabronchal |
| Jenacystein | Eurespiran |
| Jenapharm | Exomuc |
| Lantamed | Frekatuss |
| Lindocetyl | Hoestil |
| M Pectil | Hustengetränk, Optipect |
| mentopin Acetylcystein | Ilube |
| Mercapturic Acid | Larylin NAC |
| Monosodium Salt Acetylcysteine | Monoammonium salt acetylcysteine |
| MPectil | Muco Sanigen |
| M-Pectil | Mucomyst |
| Muciteran | Mucopect, Dampo |
| N Acetyl L cysteine | Mucosil |
| N Acetylcysteine | Mucosol |
| NAC AL | Mucosolvin |
| NAC Zambon | NAC, Bisolvon |
| N-Acetylcysteine | N-Acetyl-L-cysteine |
| Sodium, Acetylcysteine | Optipect Hustengetränk |
| Solmucol | Sanigen, Muco |
| Zambon, NAC | Siccoral |
| Zinc, Acetylcysteine | Siran |

| **Concept 2:**  **Diabetes mellitus** | **Associated words to be searched (MeSH OR textwords)** |
| --- | --- |
| **PubMed** (hits= 413348)  ("diabetes mellitus"[MeSH Terms] OR ("diabetes"[All Fields] AND "mellitus"[All Fields]) OR "diabetes mellitus"[All Fields]) | Diabetes mellitus |
| Glucose metabolism disorders |
| Hyperglycaemia |
| Hyperglycemia |
| Metabolic diseases |
|  |

| **Concept 3:**  **Oxidative stress** | **Associated words to be searched (MeSH OR textwords)** |
| --- | --- |
| **PubMed** (hits= 169638)  ("oxidative stress"[MeSH Terms] OR ("oxidative"[All Fields] AND "stress"[All Fields]) OR "oxidative stress"[All Fields]) | Free radical species |
| Oxidative stress |
| Oxidative stresses |
| Reactive nitrogen species |
| Reactive oxygen species |
| Stress, oxidative |
| Stresses, oxidative |

| **Concept 4:**  **Cardiovascular disease** | **Associated words to be searched (MeSH OR textwords)** |
| --- | --- |
| **PubMed** (hits= 2202372)  ("cardiovascular diseases"[MeSH Terms] OR ("cardiovascular"[All Fields] AND "diseases"[All Fields]) OR "cardiovascular diseases"[All Fields] OR ("cardiovascular"[All Fields] AND "disease"[All Fields]) OR "cardiovascular disease"[All Fields]) | Cardiomyocytes |
| Cardiomyopathy |
| Cardiovascular disease |
| Diabetic cardiomyopathy |
| Heart cells |
| Heart disease |
| Heart failure |
| Myocardial infarction |
|  |
|  |
|  |
|  |

Combine Concept 1 AND Concept 2 AND Concept 3 AND Concept 4
